# Supplementary material for: Pleiotropic Effects of the Protease-Activated Receptor 1 (PAR1) Inhibitor, Vorapaxar, on Atherosclerosis and Vascular Inflammation
Source: MDPI journal article supplement (doi:10.3390/cells10123517), 2021-12-13
Supplement: s1 [file s1]

## Supplemental Material

### Animals (in vivo studies)

| Species                      | Vendor or Source                                | Background Strain | Sex  |
|------------------------------|-------------------------------------------------|-------------------|------|
| mice: Apoe <sup>tm1Unc</sup> | Charles River Laboratories, Wilmington, MA, USA | C57BL/6           | male |

### Antibodies

| Target antigen                      | Vendor or Source                                       | Catalog #         | Working concentration |
|-------------------------------------|--------------------------------------------------------|-------------------|-----------------------|
| CD3                                 | Santa Cruz, Dallas, TX, USA                            | sc-1127           | 1:100                 |
| CD11b+/Mac-1+                       | ImmunoTools, Friesoythe, Germany                       | 21819111          | 1:500                 |
| CD68                                | Abcam, Cambridge, UK                                   | ab53444           | 1:75                  |
| CD80                                | Becton, Dickinson and Company, Franklin Lakes, NJ, USA | 553766            | 1:50                  |
| CD206                               | Abcam, Cambridge, UK                                   | ab64693           | 1:100                 |
| PAR1                                | R&D Systems, Minneapolis, MN, USA                      | MAB3855           | 1:50                  |
| PAR1 (Cleaved-Ser42), N-Terminal    | Sigma-Aldrich, St. Louis, MO, USA                      | SAB4500823        | 1:400                 |
| Secondary Antibody, Alexa Fluor 405 | Thermo Fisher Scientific, Waltham, MA, USA             | Catalog # A-31556 | 1:500                 |
| P-selectin                          | Santa Cruz, Dallas, TX, USA                            | SC8419            | 1:100                 |
| TLR2                                | Novus Biologicals, Littleton, CO, USA                  | IMG-410A          | 1:100                 |
| TLR4                                | R&D Systems, Minneapolis, MN, USA                      | AF1478            | 1:125                 |
| TLR4                                | Novus Biologicals, Littleton, CO, USA                  | IMG578A           | 1:200                 |
| VCAM-1                              | Becton, Dickinson and Company, Franklin Lakes, NJ, USA | 550547            | 1:100                 |

### DNA/cDNA Clones

| Clone Name    | Sequence      | Source / Repository                        |
|---------------|---------------|--------------------------------------------|
| ABCA1         | Hs01059137_m1 | Thermo Fisher Scientific, Waltham, MA, USA |
| ABCG1         | Hs00245154_m1 |                                            |
| CCL2          | Mm00441242_m1 |                                            |
| CD36          | Hs00354519_m1 |                                            |
| E-selectin    | Mm00441278_m1 |                                            |
| 18s           | Mm03928990_g1 |                                            |
| 18s           | Hs99999901_s1 |                                            |
| IFN- $\gamma$ | Mm00801778_m1 |                                            |
| IL-1 $\beta$  | Mm00434228_m1 |                                            |
| IL-12B        | Mm99999067_m1 |                                            |
| IL2           | Mm00434256_m1 |                                            |
| LOX-1         | Hs01552593_m1 |                                            |
| SR-A1         | Hs00398296_g1 |                                            |
| TF            | Hs00175225_m1 |                                            |

|               |               |  |
|---------------|---------------|--|
| TF            | Mm00438855_m1 |  |
| TLR2          | Hs02621280_s1 |  |
| TLR4          | Hs00152939_m1 |  |
| TLR2          | Mm00442346_m1 |  |
| TLR4          | Mm00445273_m1 |  |
| TNF- $\alpha$ | Mm00443258_m1 |  |
| VCAM-1        | Hs01003372_m1 |  |
| VCAM-1        | Mm0049197_m1  |  |

## Cultured Cells

| Name  | Vendor or Source                                        |
|-------|---------------------------------------------------------|
| THP-1 | ATCC # TIB 202,<br>Sigma-Aldrich, St.<br>Louis, MO, USA |

## Other

| Description                         | Source / Repository                                 |
|-------------------------------------|-----------------------------------------------------|
| Candesartan                         | Tocris, Bristol, UK<br>Cat. No. 4791                |
| Cholesterol                         | Elabscience, Elabscience<br>E-EL-M2608              |
| C-Reactive Protein/CRP DuoSet ELISA | R&D, Minneapolis, MN, USA<br>Catalog # DY1707       |
| E-Selectin/CD62E DuoSet ELISA       | R&D, Minneapolis, MN, USA<br>Catalog # DY724        |
| ICAM-1/CD54 DuoSet ELISA            | R&D, Minneapolis, MN, USA<br>Catalog # DY720        |
| IL-6 DuoSet ELISA                   | R&D, Minneapolis, MN, USA<br>Catalog # DY206        |
| Isoflurane                          | AbbVie, Lake Bluff, IL, USA                         |
| Oil red O Staining kit              | Abcam, Cambridge, UK                                |
| PECAM-1/CD31 Dynabeads™             | Invitrogen, Waltham, MA, USA                        |
| LPS                                 | Sigma-Aldrich, St. Louis, MO, USA<br>#L2630         |
| oxLDL                               | Bio-Rad, Hercules, CA, USA<br>5685-3557             |
| Pam3CSK4                            | R&D, Minneapolis, MN, USA<br>Catalog 4633/1         |
| PF4/CXCL4 ELISA                     | R&D, Minneapolis, MN, USA<br>Catalog # MCX400       |
| P-selectin ELISA                    | R&D, Minneapolis, MN, USA<br>Catalog # MPS00        |
| TAT ELISA                           | Novus Biologicals, Littleton, CO, USA<br>NBP2-75962 |

|                               |                                                |
|-------------------------------|------------------------------------------------|
| TFLLR-NH2                     | Tocris, Bristol, UK<br>1464                    |
| Thrombin                      | Sigma-Aldrich, St. Louis, MO, USA<br>T9326     |
| TNF-alpha Quantikine HS ELISA | R&D, Minneapolis, MN, USA<br>Catalog # HSTA00E |
| Western type diet             | ssniff, Soest, Germany<br>no. E15721-34        |
| VCAM-1/CD106 DuoSet ELISA     | R&D, Minneapolis, MN, USA<br>Catalog # DY809   |
| Vorapaxar                     | Selleckchem, Houston, TX, USA                  |
